# Supplementary material
Source: MDPI journal article supplement (https://www.mdpi.com/2073-445X/11/4/502)
Supplement: s1 [file s1]

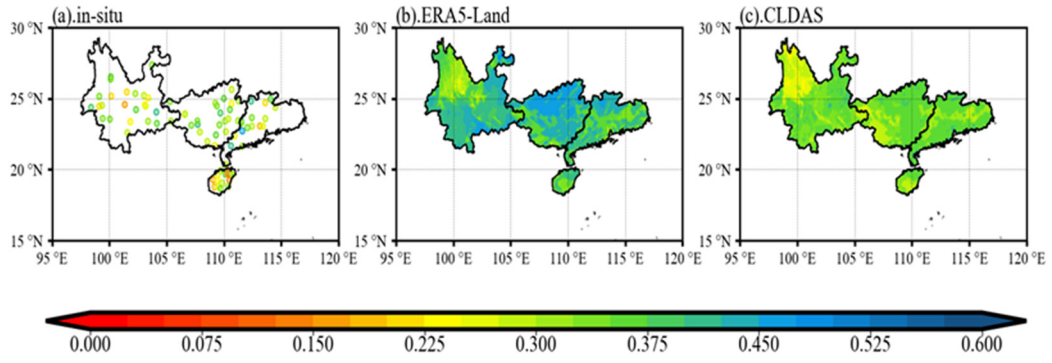

**Figure S1.** Distribution of average soil moisture about the in situ, ERA5-Land and CLDAS from 2013 to 2017.

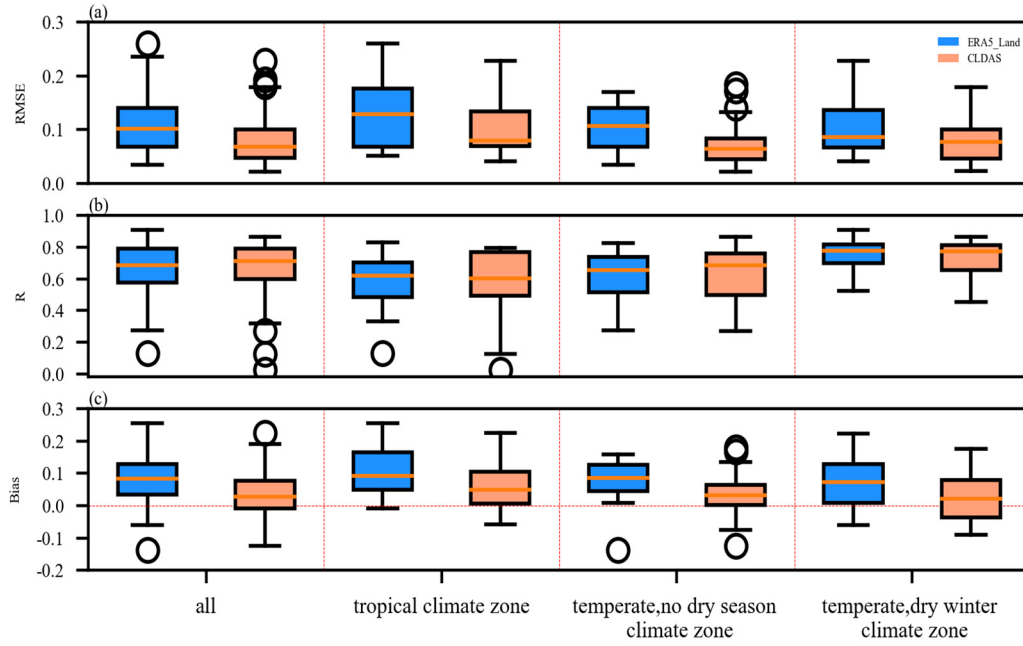

**Figure S2.** RMSE, R and Bias of the SM between the ERA5-Land and in situ data and between CLDAS and in situ data in the whole study area and the three climate zones.

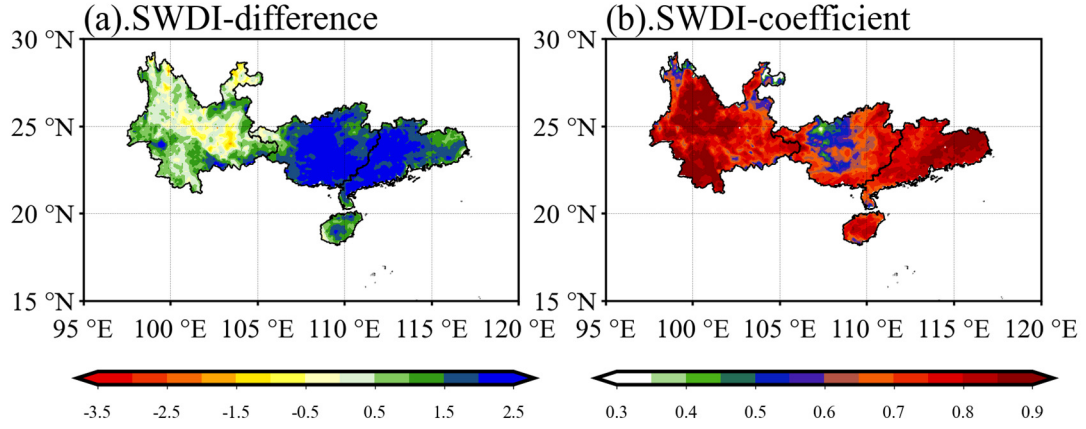

**Figure S3.** Spatial distribution of difference (a) and correlation coefficient (b) between ERA5-Land and CLDAS. All values of SWDI for the periods from 2013 to 2017.

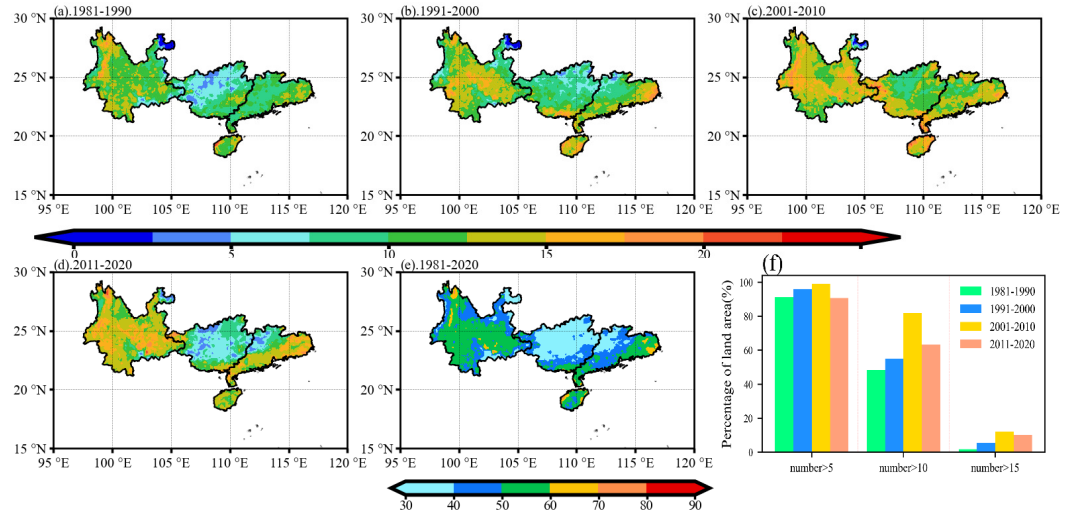

**Figure S4.** The distribution of drought event number for 1981-1990 (a), 1991-2000 (b), 2001-2010 (c), 2011-2020 (d) and 1981-2020 (e) according to SWDI and the proportion of drought number in each decade (f). Note that Figure 10e has a different legend from others.

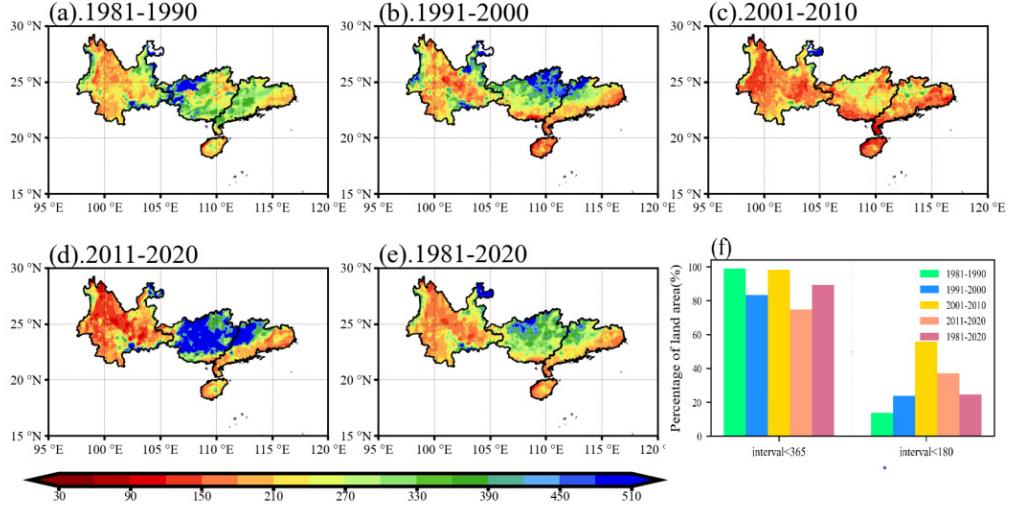

**Figure S5.** The distribution of drought event interval for 1981-1990 (a), 1991-2000 (b), 2001-2010 (c), 2011-2020 (d) and 1981-2020 (e) according to SWDI and the proportion of drought interval in each period (f).

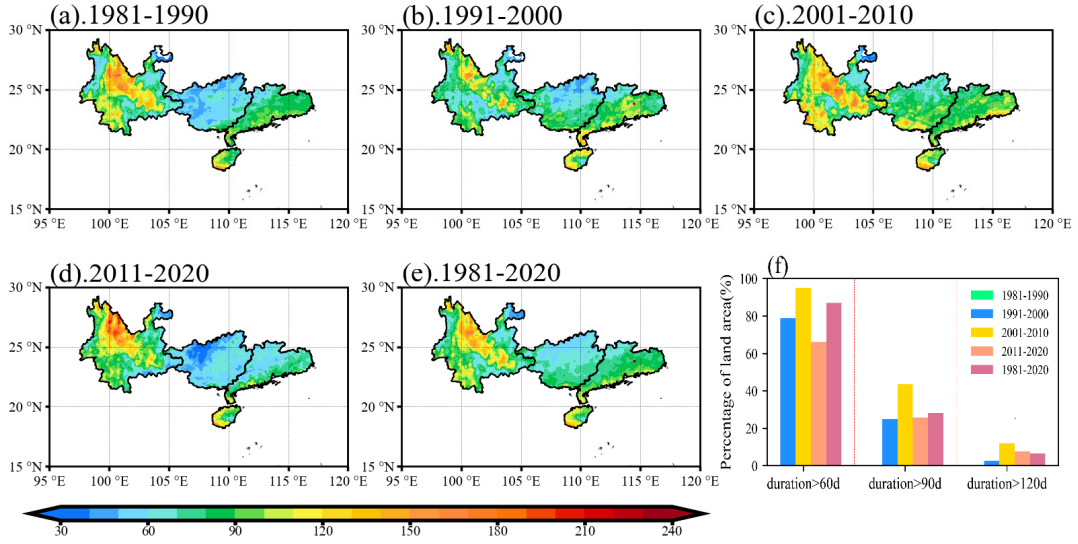

**Figure S6.** The distribution of drought event duration for 1981-1990 (a), 1991-2000 (b), 2001-2010 (c), 2011-2020 (d) and 1981-2020 (e) according to SWDI and the proportion of drought duration in each period (f).

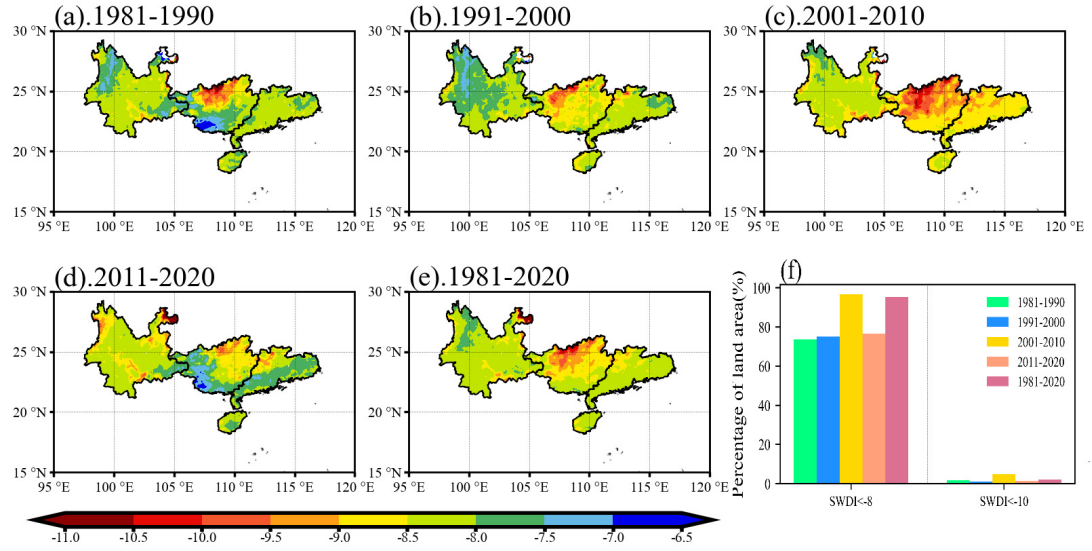

**Figure S7.** The distribution of drought event severity for 1981-1990 (a), 1991-2000 (b), 2001-2010 (c), 2011-2020 (d) and 1981-2020 (e) according to SWDI and the proportion of drought severity in each period (f).
